# Supplementary material for: Computational Design and Development of Benzodioxane-Benzamides as Potent Inhibitors of FtsZ by Exploring the Hydrophobic Subpocket
Source: MDPI journal article supplement (doi:10.3390/antibiotics10040442), 2021-04-15
Supplement: s1 [file s1]

# Supporting Information

## Computational Design and Development of Benzodioxane-Benzamides as Potent Inhibitors of FtsZ by Exploring the Hydrophobic Subpocket.

Valentina Straniero\*<sup>§</sup>, Victor Sebastián-Pérez <sup>§</sup>, Lorenzo Suigo, William Margolin, Andrea Casiraghi, Martina Hrast, Carlo Zanotto, Irena Zdovc, Antonia Radaelli and Ermanno Valoti

### Summary

|                                                                                                                  |    |
|------------------------------------------------------------------------------------------------------------------|----|
| <b>3-[2-(7-(5-methyl-1,2,4-oxadiazol-3-yl)-1,4-benzodioxan-2-yl)ethyloxy]-2,6-difluorobenzamide (1)</b> .....    | 3  |
| Figure S1: <sup>1</sup> H-NMR spectrum of Compound 1 .....                                                       | 3  |
| Figure S2: <sup>13</sup> C-NMR spectrum of Compound 1 .....                                                      | 3  |
| Figure S3: HPLC chromatogram of Compound 1 .....                                                                 | 4  |
| <b>3-[2-(7-(5-ethyl-1,2,4-oxadiazol-3-yl)-1,4-benzodioxan-2-yl)ethyloxy]-2,6-difluorobenzamide (2)</b> .....     | 5  |
| Figure S4: <sup>1</sup> H-NMR spectrum of Compound 2 .....                                                       | 5  |
| Figure S5: <sup>13</sup> C-NMR spectrum of Compound 2 .....                                                      | 5  |
| Figure S6: HPLC chromatogram of Compound 2 .....                                                                 | 6  |
| <b>3-[2-(7-(5-methylthio-1,2,4-oxadiazol-3-yl)-1,4-benzodioxan-2-yl)ethyloxy]-2,6-difluorobenzamide (3)</b> .... | 7  |
| Figure S7: <sup>1</sup> H-NMR spectrum of Compound 3 .....                                                       | 7  |
| Figure S8: <sup>13</sup> C-NMR spectrum of Compound 3 .....                                                      | 7  |
| Figure S9: HPLC chromatogram of Compound 3 .....                                                                 | 8  |
| <b>3-[(2,3-dihydronaphtho[2,3-<i>b</i>][1,4]dioxin-2-yl)methoxy]-2,6-difluorobenzamide (4)</b> .....             | 9  |
| Figure S10: <sup>1</sup> H-NMR spectrum of Compound 4 .....                                                      | 9  |
| Figure S11: <sup>13</sup> C-NMR spectrum of Compound 4 .....                                                     | 9  |
| Figure S12: HPLC chromatogram of Compound 4 .....                                                                | 10 |
| <b>3-[2-(2,3-dihydronaphtho[2,3-<i>b</i>][1,4]dioxin-2-yl)ethoxy]-2,6-difluorobenzamide (5)</b> .....            | 11 |
| Figure S13: <sup>1</sup> H-NMR spectrum of Compound 5 .....                                                      | 11 |
| Figure S14: <sup>13</sup> C-NMR spectrum of Compound 5 .....                                                     | 11 |
| Figure S15: HPLC chromatogram of Compound 5 .....                                                                | 12 |
| <b>3-[(3-(naphthalen-2-yl)propyl-1-oxy)-2,6-difluorobenzamide (6)</b> .....                                      | 13 |
| Figure S16: <sup>1</sup> H-NMR spectrum of Compound 6 .....                                                      | 13 |
| Figure S17: <sup>13</sup> C-NMR spectrum of Compound 6 .....                                                     | 13 |
| Figure S18: HPLC chromatogram of Compound 6 .....                                                                | 14 |
| <b>3-(2,3,6,7,8,9-hexahydronaphtho[2,3-<i>b</i>][1,4]dioxin-2-yl)methoxy]-2,6-difluorobenzamide (7)</b> .....    | 15 |
| Figure S19: <sup>1</sup> H-NMR spectrum of Compound 7 .....                                                      | 15 |
| Figure S20: <sup>13</sup> C-NMR spectrum of Compound 7 .....                                                     | 15 |
| Figure S21: HPLC chromatogram of Compound 7 .....                                                                | 16 |
| <b>3-[2-(2,3,6,7,8,9-hexahydronaphtho[2,3-<i>b</i>][1,4]dioxin-2-yl)ethoxy]-2,6-difluorobenzamide (8)</b> .....  | 17 |

|                                                              |    |
|--------------------------------------------------------------|----|
| Figure S22: $^1\text{H}$ -NMR spectrum of Compound 8.....    | 17 |
| Figure S23: $^{13}\text{C}$ -NMR spectrum of Compound 8..... | 17 |
| Figure S24: HPLC chromatogram of Compound 8.....             | 18 |

3-[2-(7-(5-methyl-1,2,4-oxadiazol-3-yl)-1,4-benzodioxan-2-yl)ethoxy]-2,6-difluorobenzamide (1)

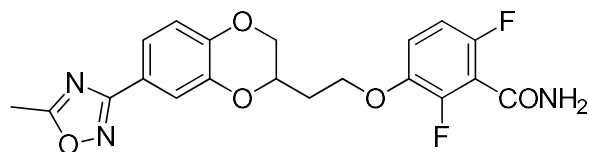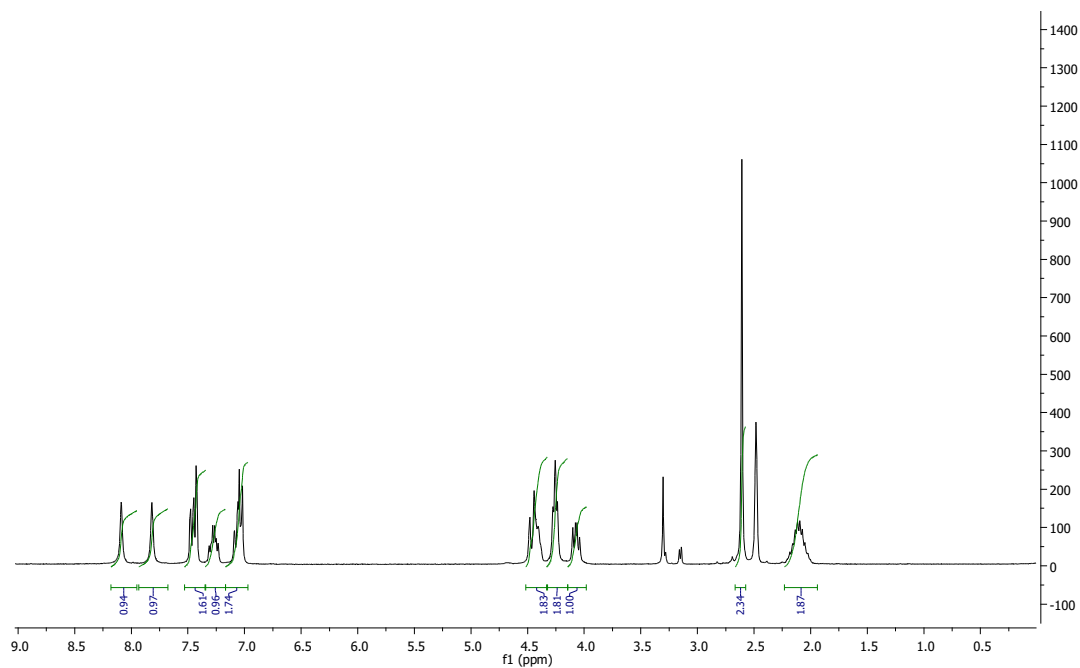

Figure S1:  $^1\text{H}$ -NMR spectrum of Compound 1

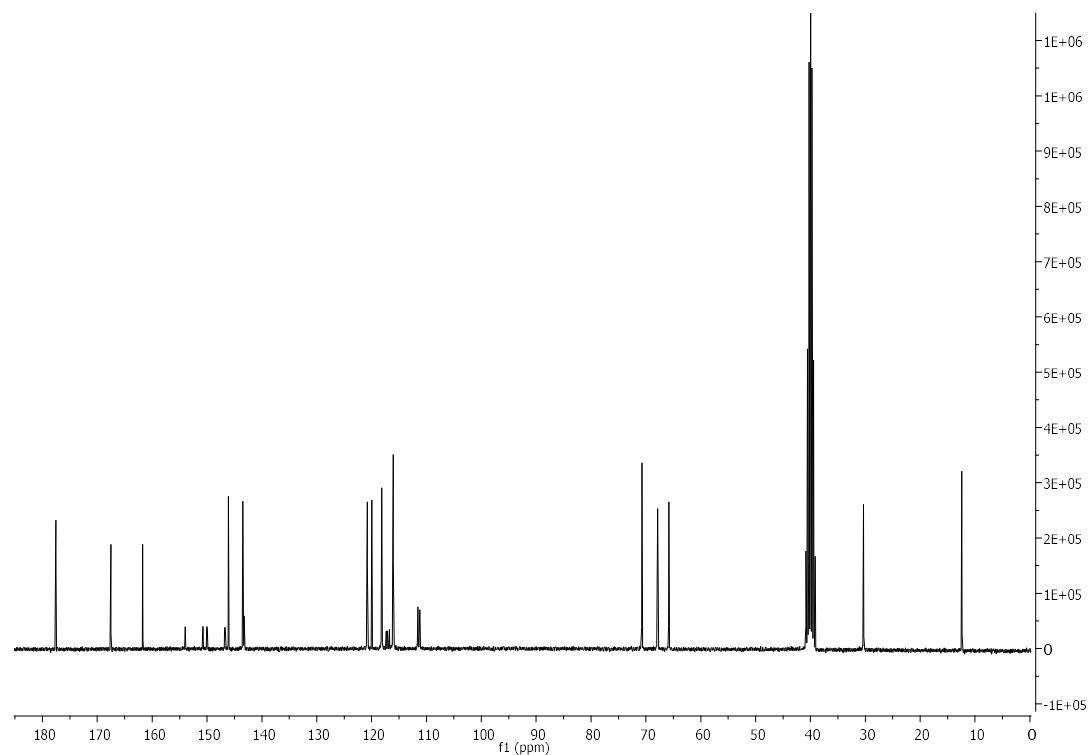

Figure S2:  $^{13}\text{C}$ -NMR spectrum of Compound 1

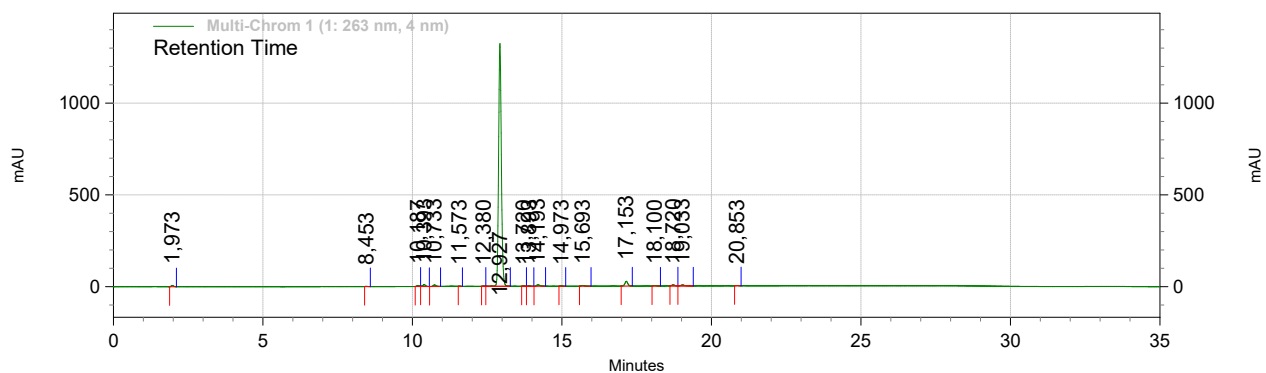

Figure S3: HPLC chromatogram of Compound 1

3-[2-(7-(5-ethyl-1,2,4-oxadiazol-3-yl)-1,4-benzodioxan-2-yl)ethoxy-2,6-difluorobenzamide (2)

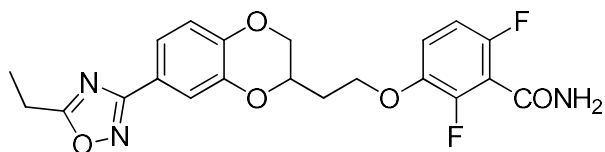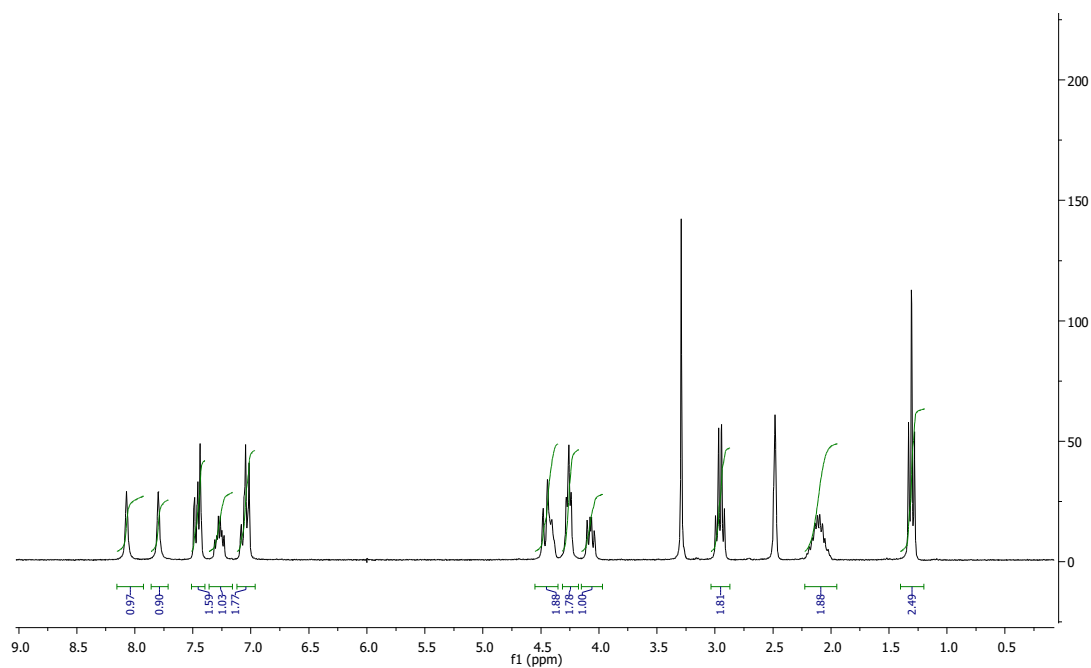

Figure S4: <sup>1</sup>H-NMR spectrum of Compound 2

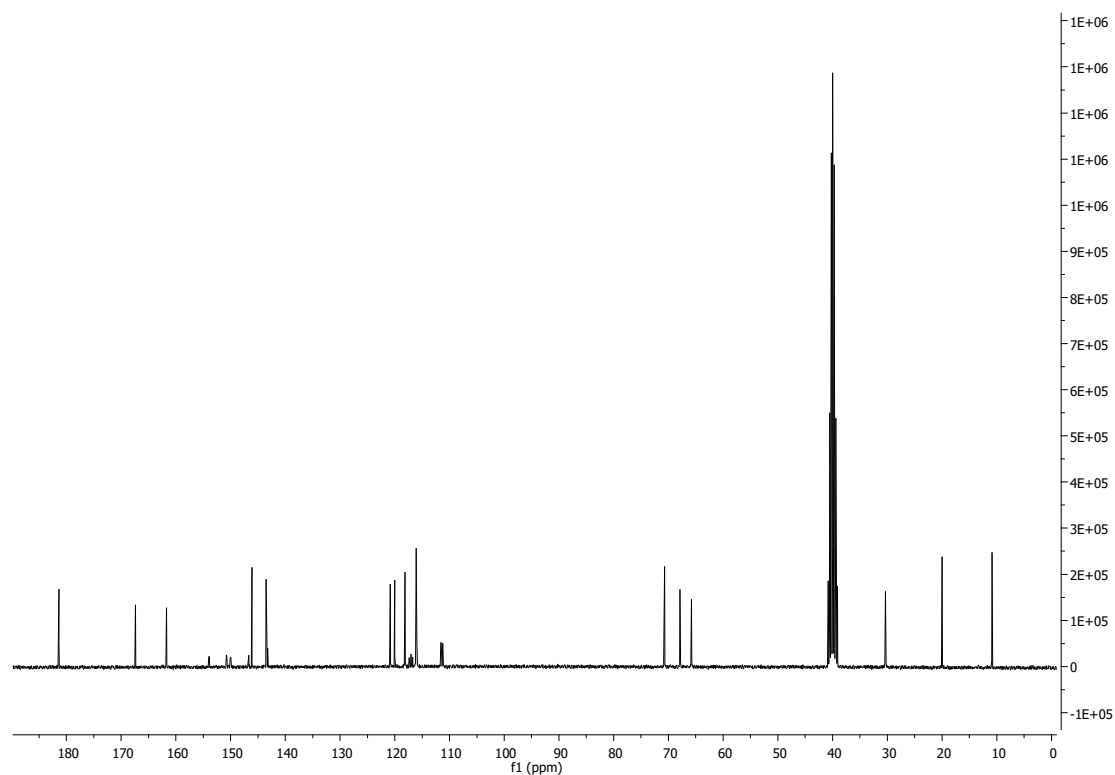

Figure S5: <sup>13</sup>C-NMR spectrum of Compound 2

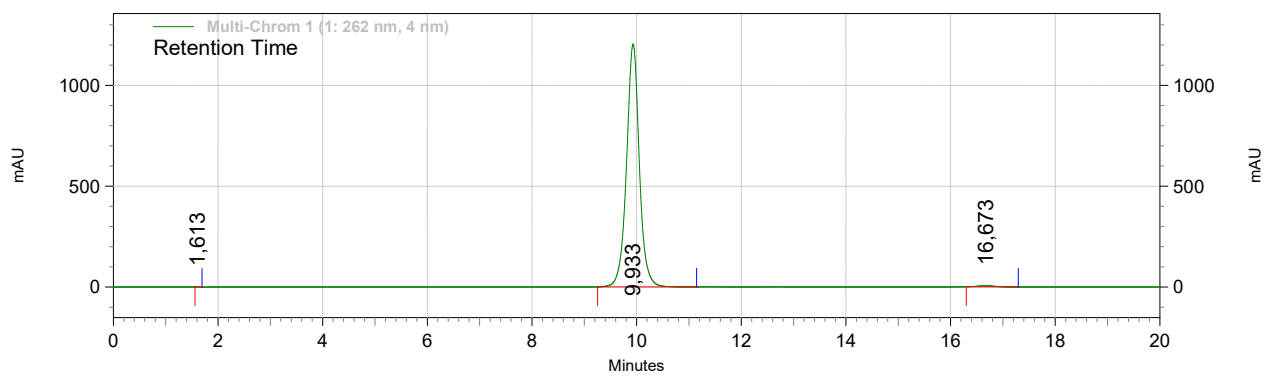

Figure S6: HPLC chromatogram of Compound 2

3-[2-(7-(5-methylthio-1,2,4-oxadiazol-3-yl)-1,4-benzodioxan-2-yl)ethoxy]-2,6-difluorobenzamide (3)

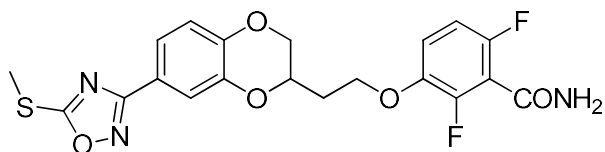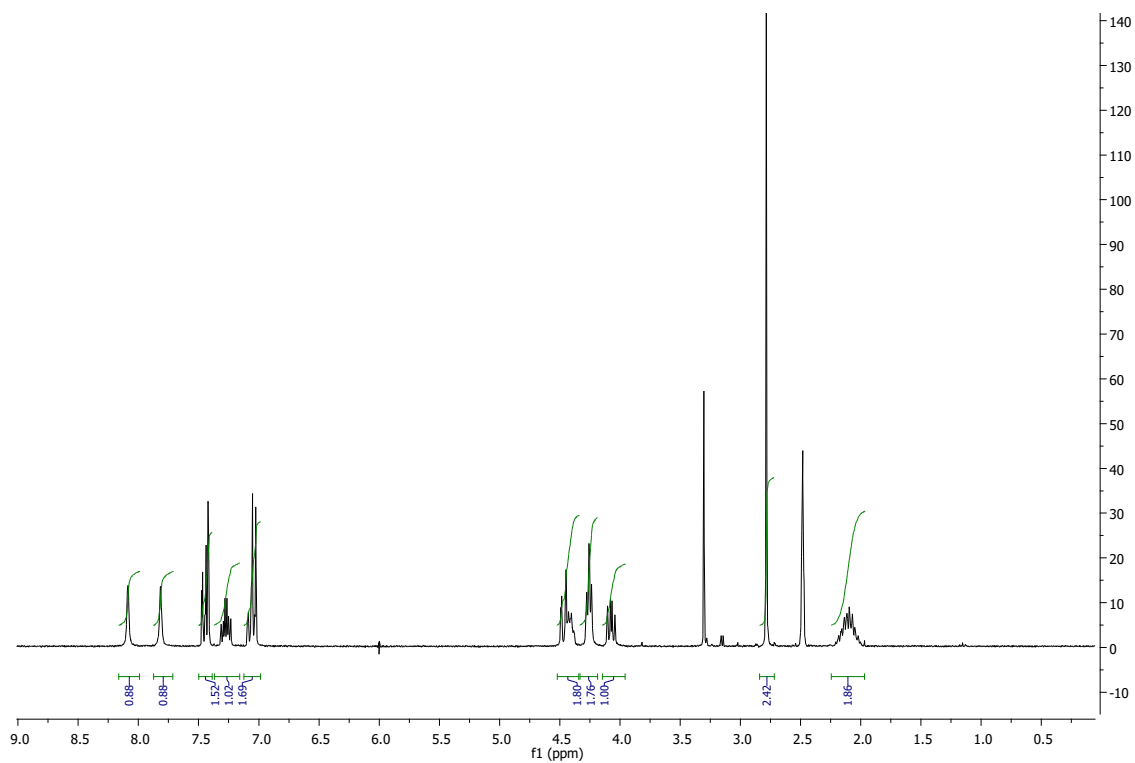

Figure S7:  $^1\text{H}$ -NMR spectrum of Compound 3

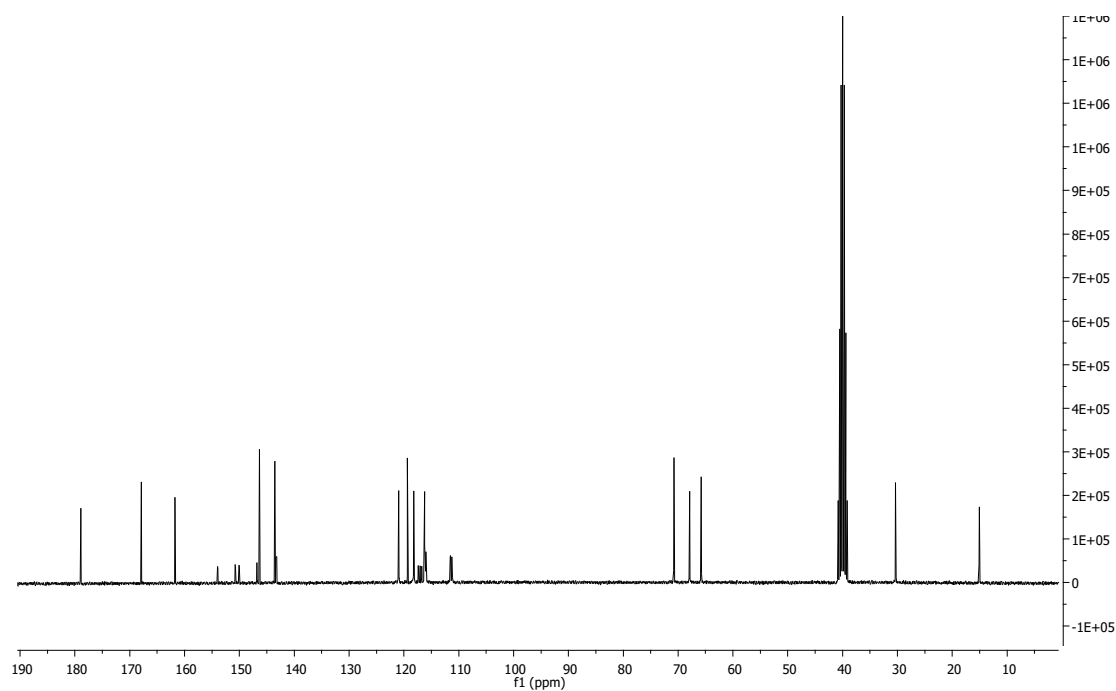

Figure S8:  $^{13}\text{C}$ -NMR spectrum of Compound 3

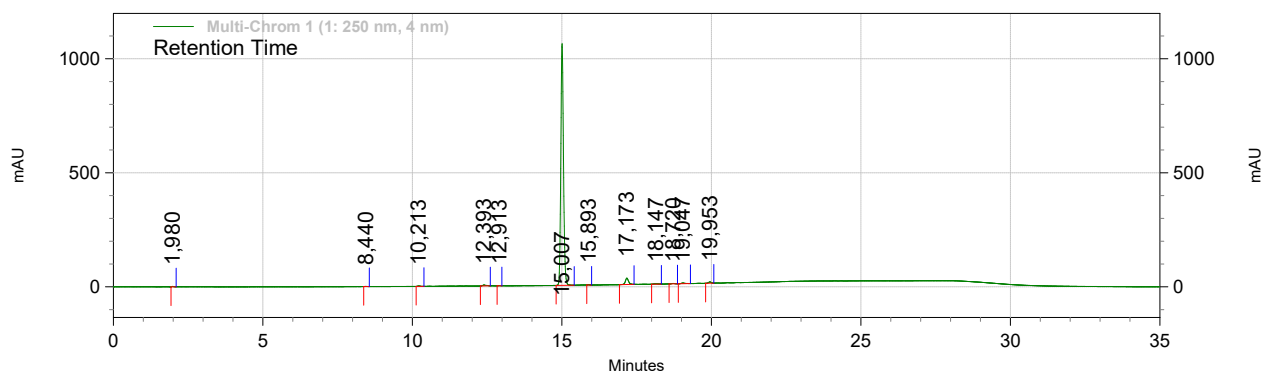

Figure S9: HPLC chromatogram of Compound 3



3-[(2,3-dihydronaphtho[2,3-b][1,4]dioxin-2-yl)methoxy]-2,6-difluorobenzamide (4)

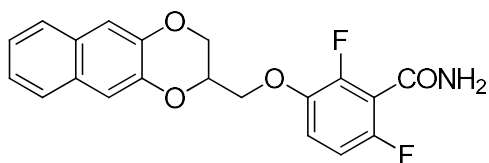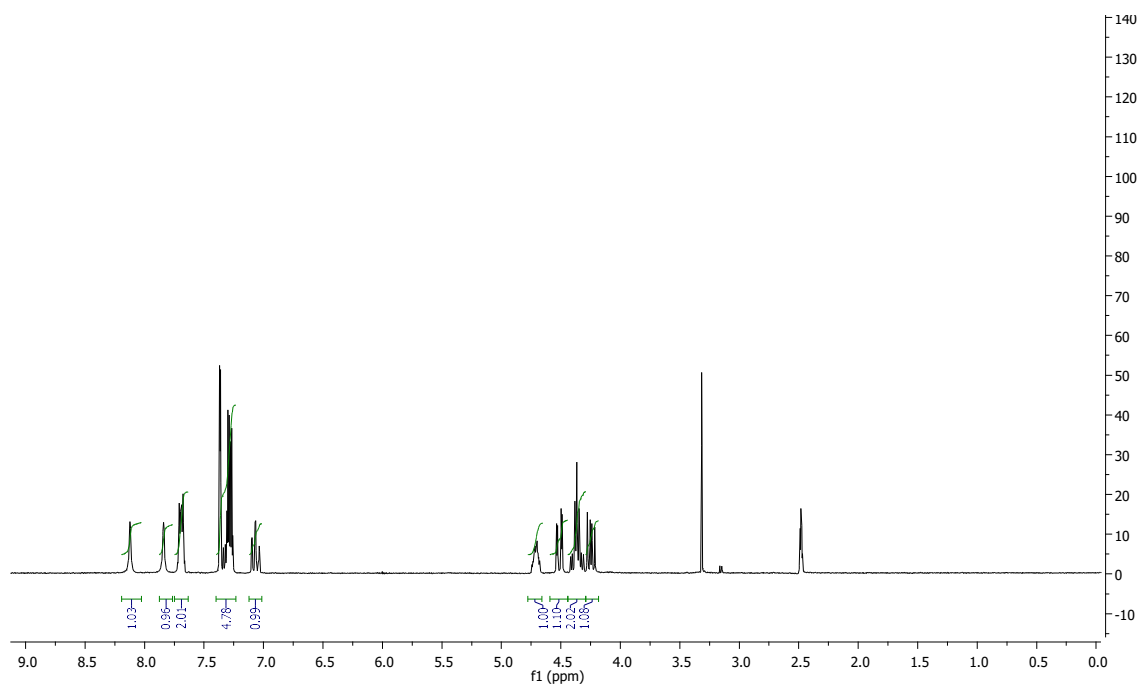

Figure S10:  $^1\text{H-NMR}$  spectrum of Compound 4

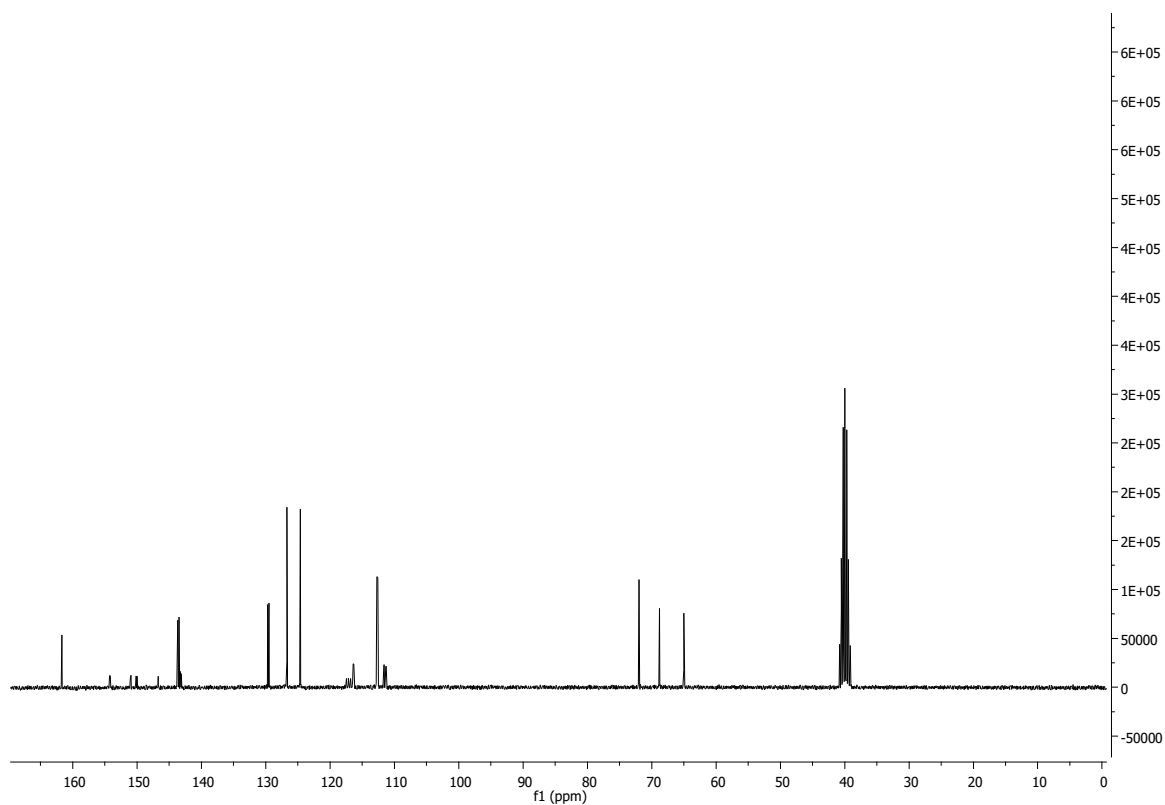

Figure S11:  $^{13}\text{C-NMR}$  spectrum of Compound 4

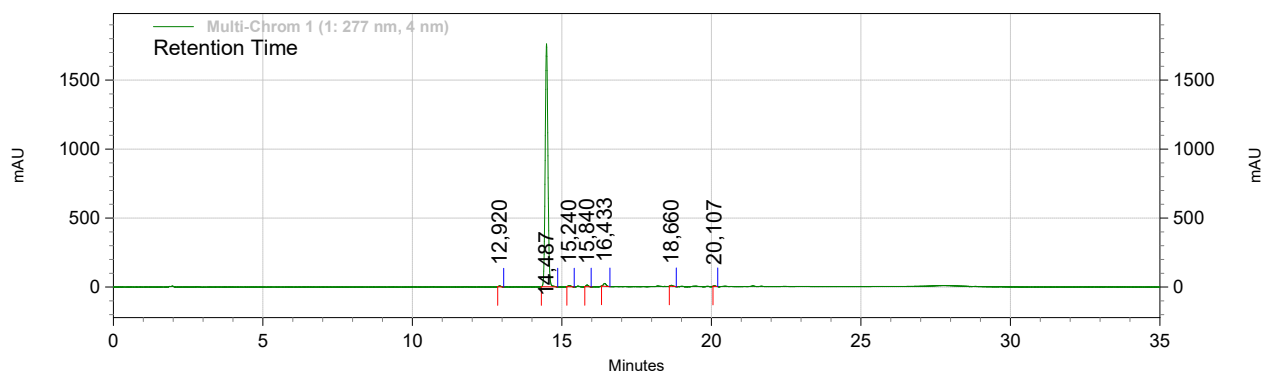

Figure S12: HPLC chromatogram of Compound 4

3-[2-(2,3-dihydronaphtho[2,3-b][1,4]dioxin-2-yl)ethoxy]-2,6-difluorobenzamide (5)

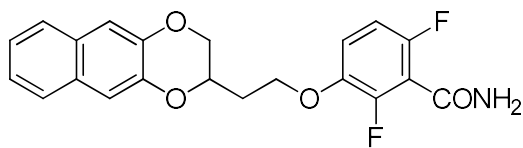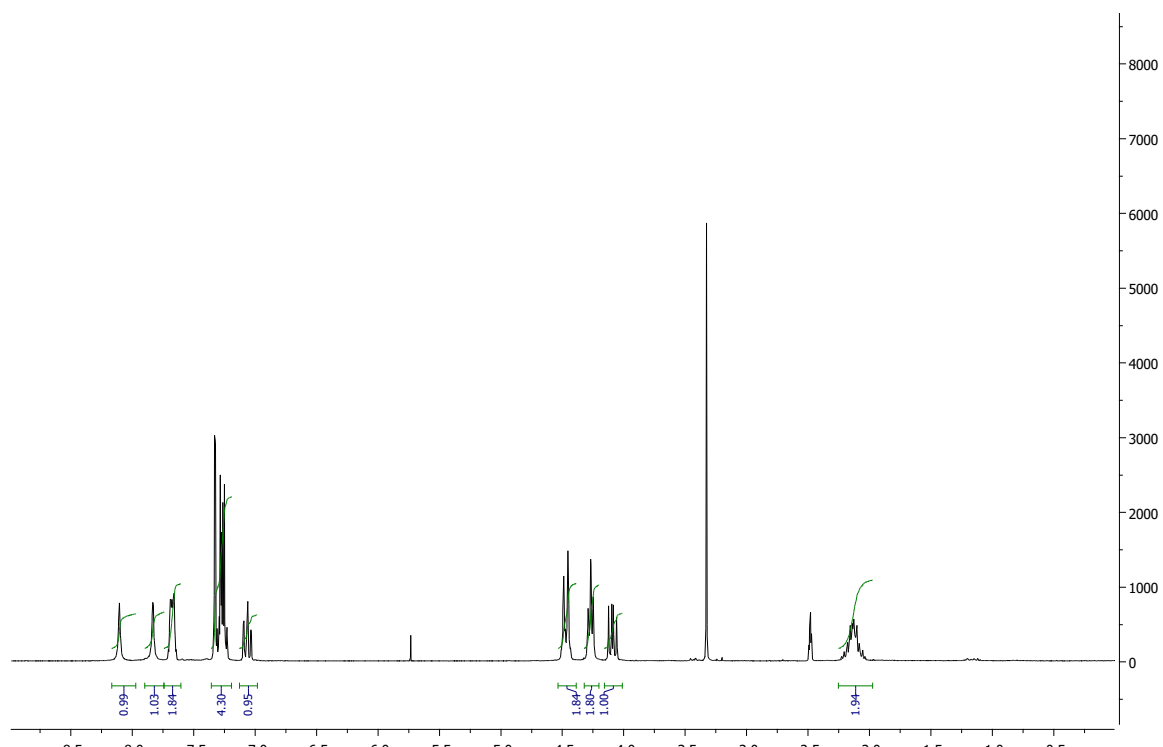

Figure S13: <sup>1</sup>H-NMR spectrum of Compound 5

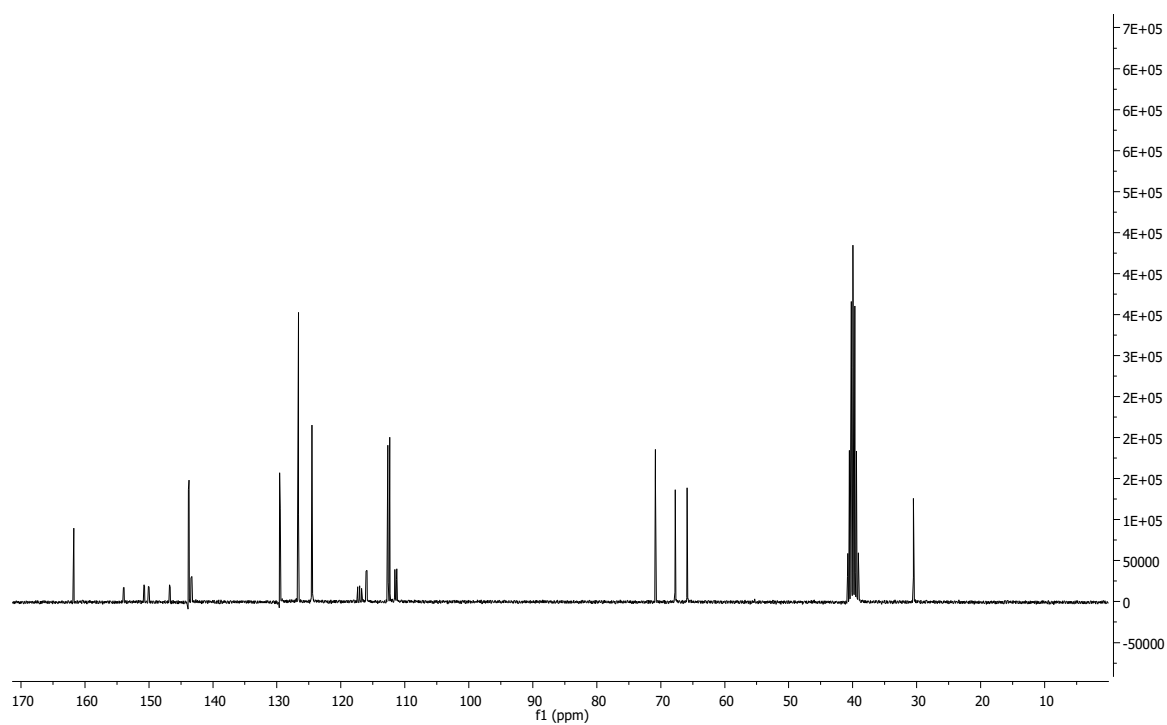

Figure S14: <sup>13</sup>C-NMR spectrum of Compound 5

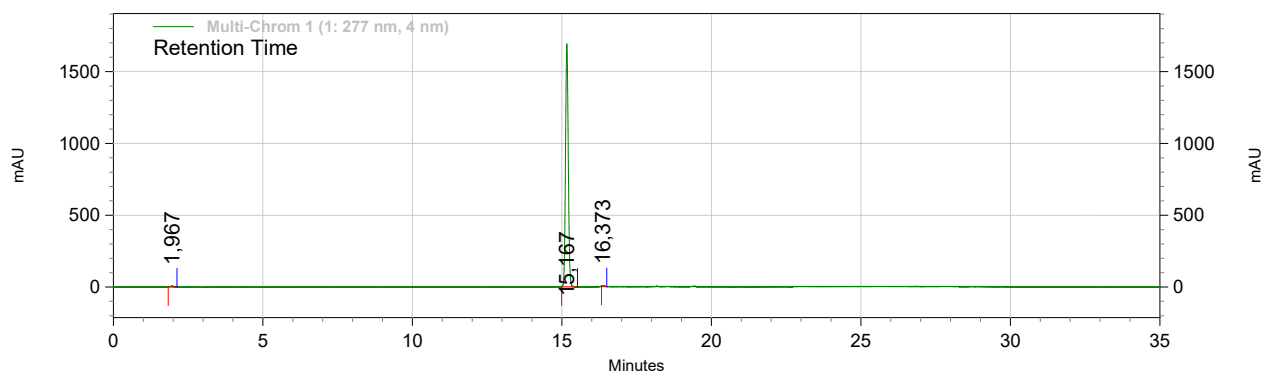

Figure S15: HPLC chromatogram of Compound 5

### 3-[(3-(naphthalen-2-yl)propyl-1-oxy]-2,6-difluorobenzamide (6)

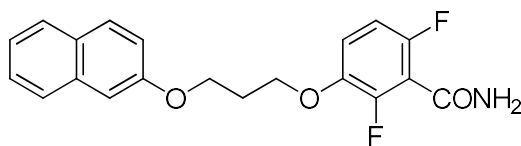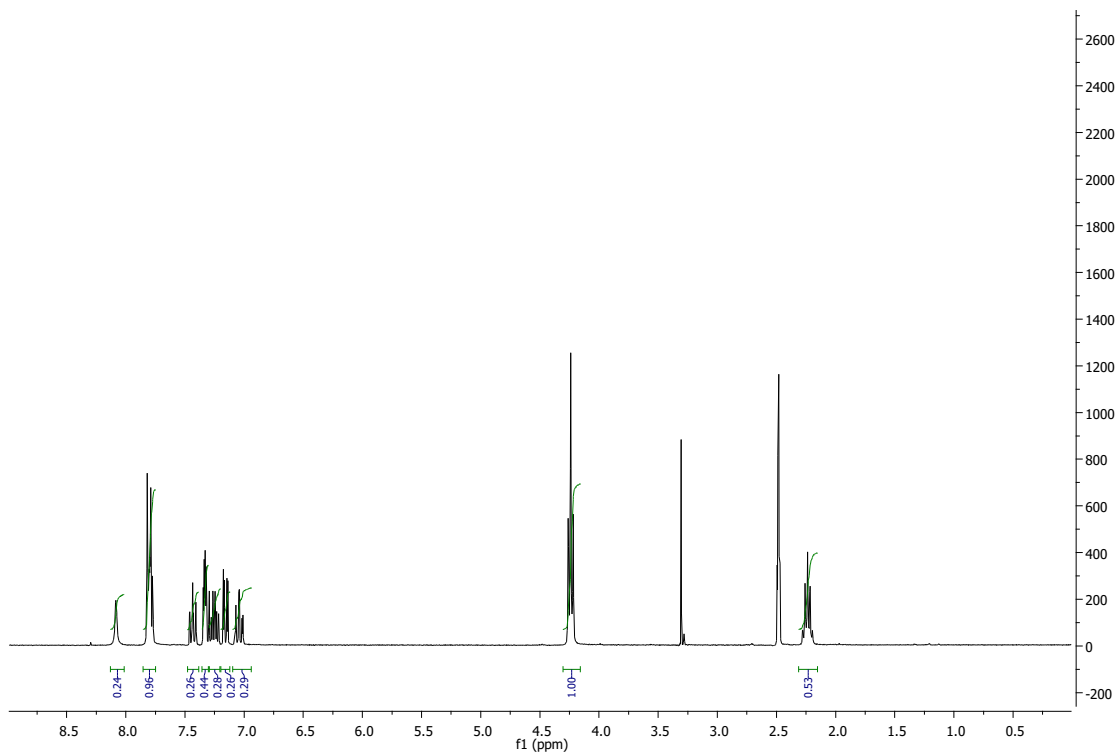

Figure S16: <sup>1</sup>H-NMR spectrum of Compound 6

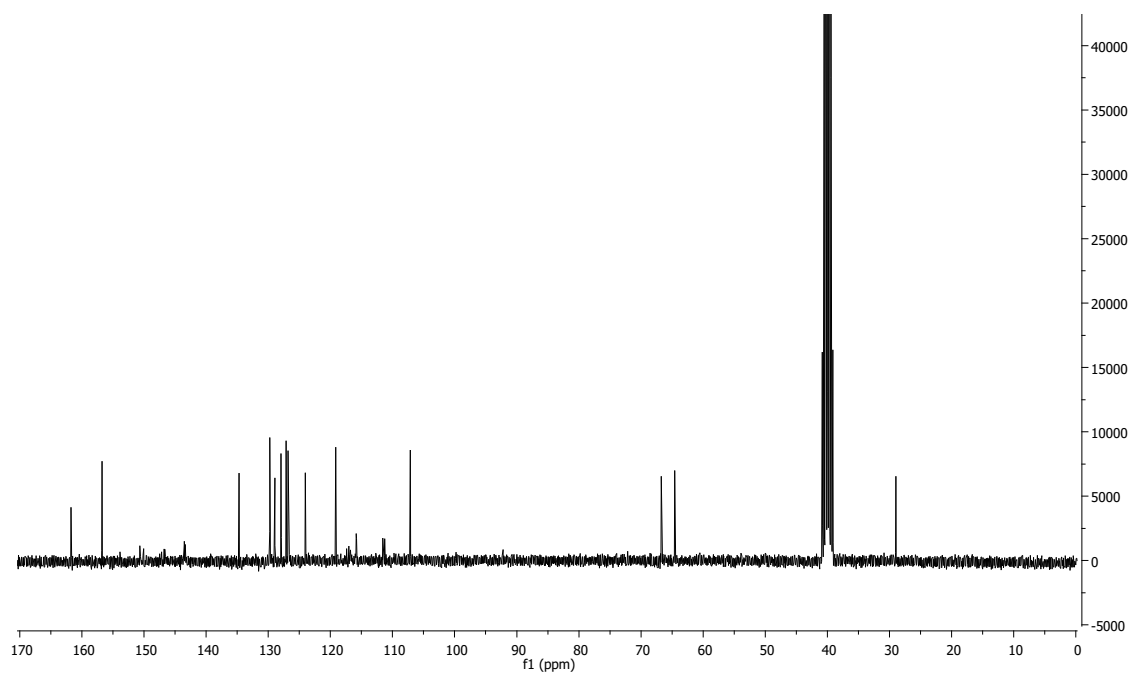

Figure S17: <sup>13</sup>C-NMR spectrum of Compound 6

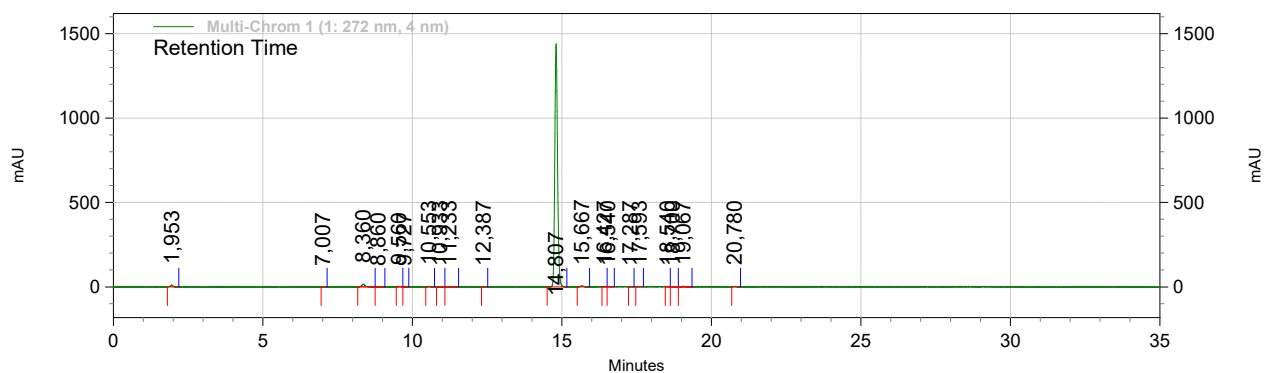

Figure S18: HPLC chromatogram of Compound 6

3-(2,3,6,7,8,9-hexahydronaphtho[2,3-*b*][1,4]dioxin-2-yl)methoxy]-2,6-difluorobenzamide (7)

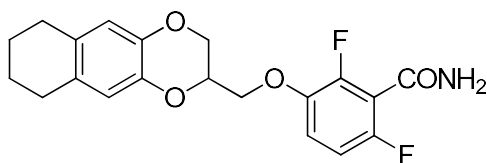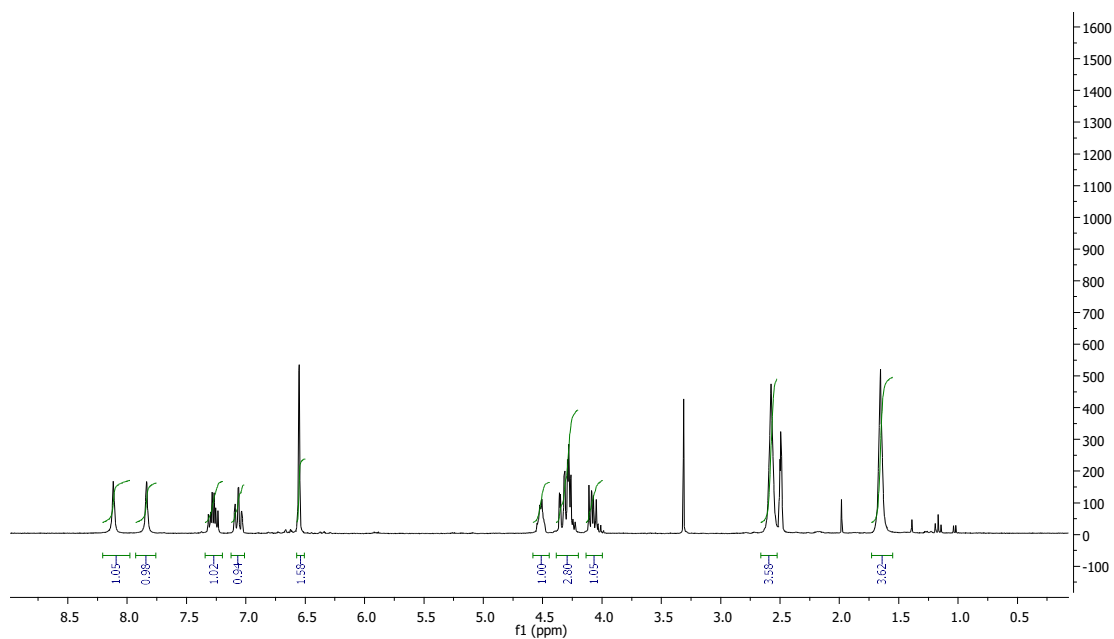

Figure S19: <sup>1</sup>H-NMR spectrum of Compound 7

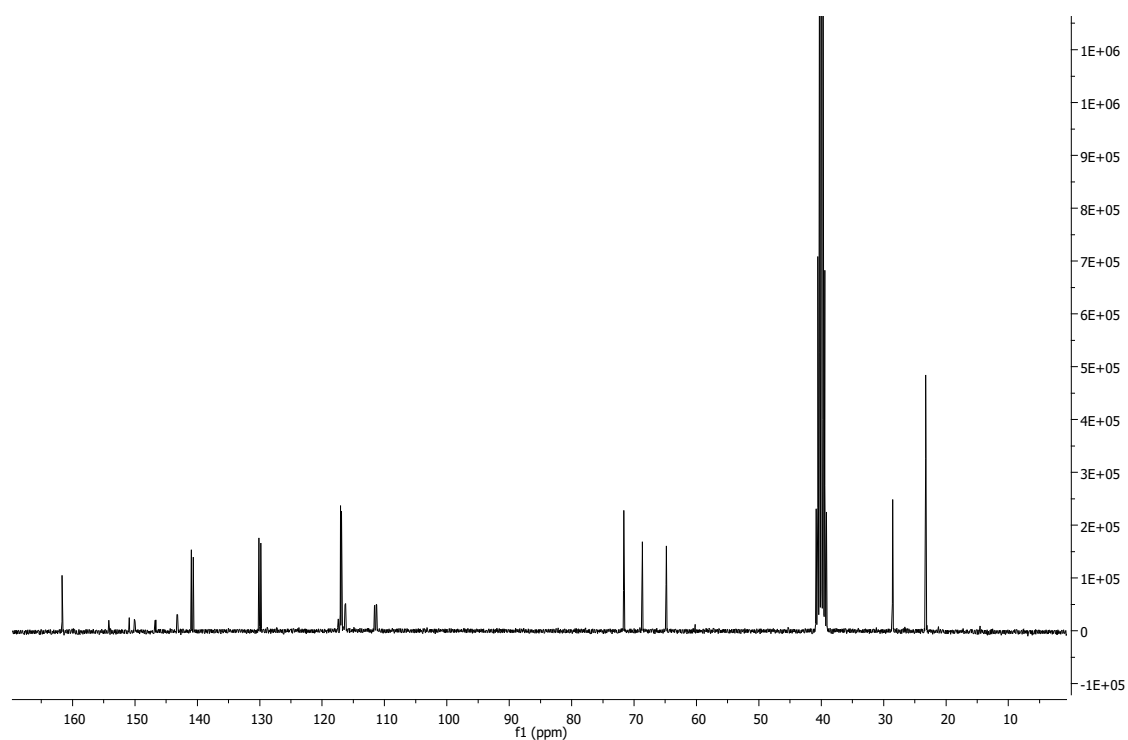

Figure S20: <sup>13</sup>C-NMR spectrum of Compound 7

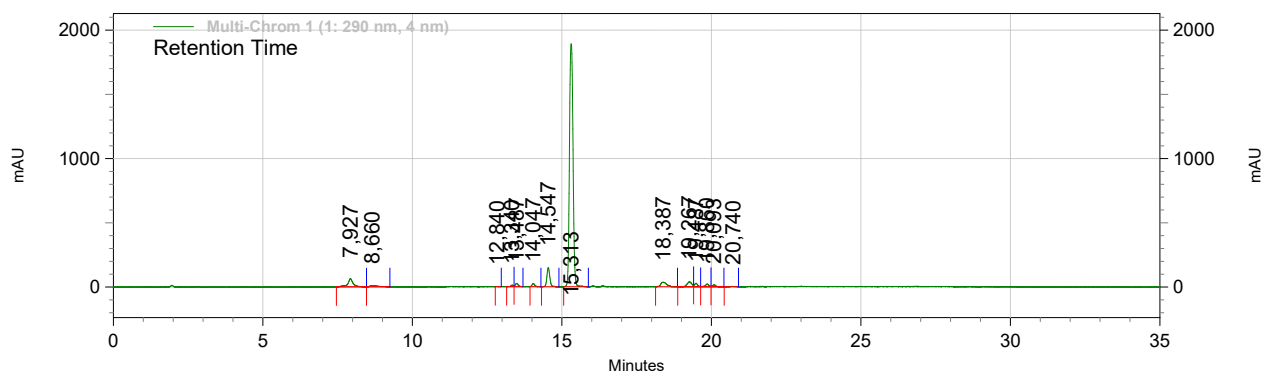

Figure S21: HPLC chromatogram of Compound 7



3-[2-(2,3,6,7,8,9-hexahydronaphtho[2,3-*b*][1,4]dioxin-2-yl)ethoxy]-2,6-difluorobenzamide (8)

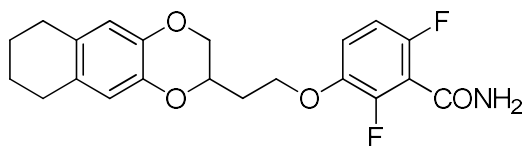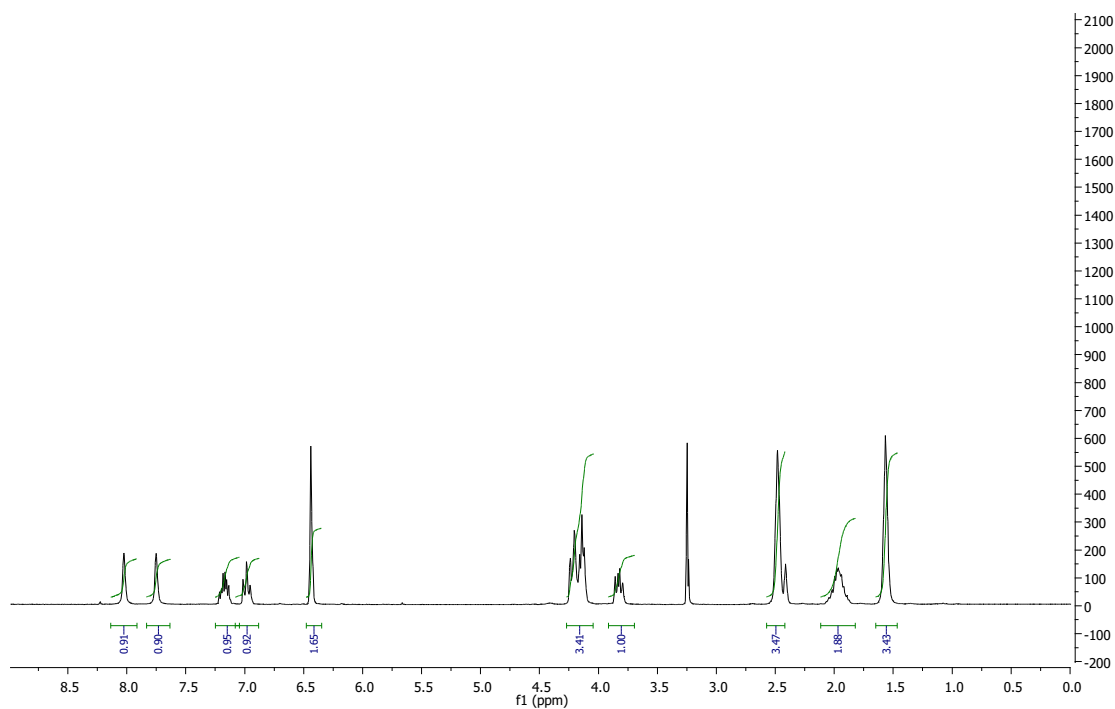

Figure S22: <sup>1</sup>H-NMR spectrum of Compound 8

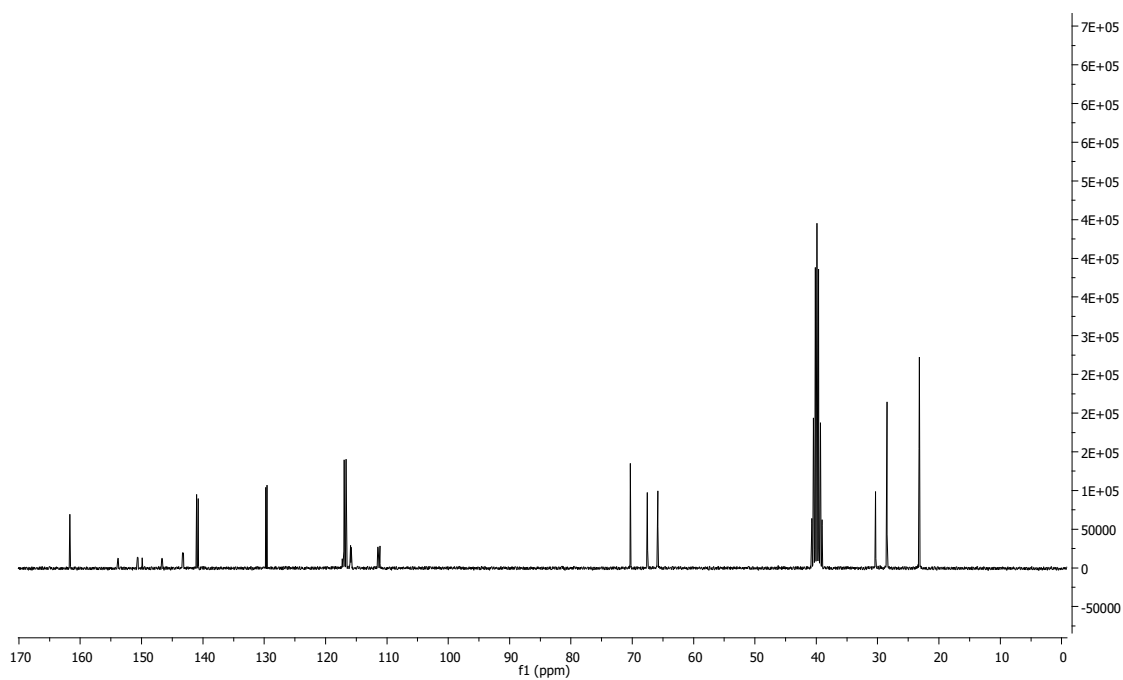

Figure S23: <sup>13</sup>C-NMR spectrum of Compound 8

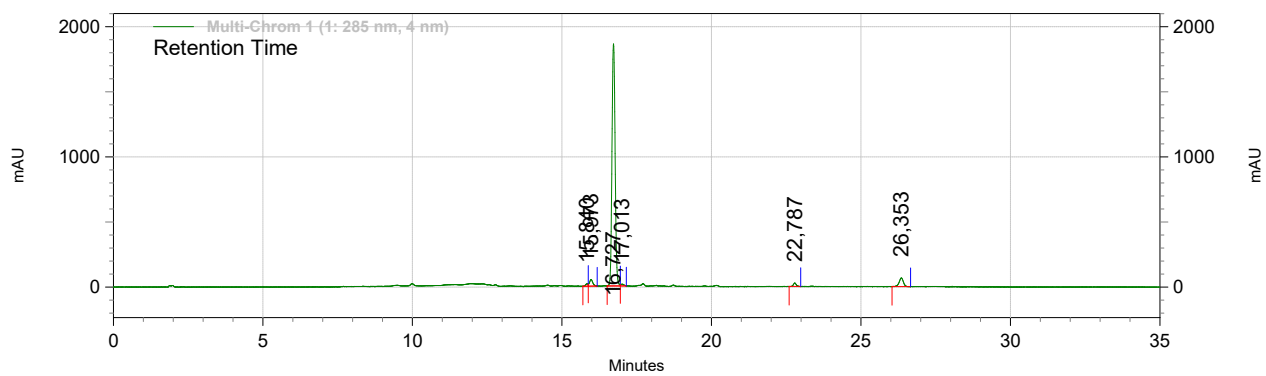

Figure S24: HPLC chromatogram of Compound 8
